# Supplementary material for: Flexible full-solid state supercapacitors based on zinc sulfide spheres growing on carbon textile with superior charge storage
Source: Royal Society of Chemistry journal article supplement (doi:10.1039/c5ta08752j), 2015-11-27
Supplement: c5ta08752j1.pdf [file c5ta08752j1.pdf]

## Supporting Information

### **Flexible full-solid state supercapacitor based on zinc sulfide spheres growing on carbon textile with superior charge storage**

Muhammad Sufyan Javed<sup>a,b</sup>, Jie Chen<sup>a</sup>, Lin Chen<sup>a</sup>, Yi Xi<sup>a</sup>, CuilinZhang<sup>a</sup>, BuyongWan<sup>a</sup>,  
ChenguoHu<sup>a\*</sup>

<sup>a</sup>*Department of Applied Physics, ChongqingUniversity, Chongqing 400044, P. R. China*

<sup>b</sup>*Department of Physics, COMSATS Institute of Information Technology Lahore54000, Pakistan*

*\*Corresponding author. Tel: +86 23 65670880; Fax: +86 23 65678362*

*E-mail address:* [hucg@cqu.edu.cn](mailto:hucg@cqu.edu.cn) (CG Hu)

**Figure S1:** Optical photographs of carbon textile (CT). (A) Bare CT, (B) ZnS nanospheres assembled CT, (C) Annealed ZnS nanospheres assembled CT

**Figure S2:** Schematic diagram of the fabrication process of ZnS assembled carbon textile with annealing process

**Figure S3:** (A) N<sub>2</sub> adsorption–desorption isotherm, (B) BJH adsorption pore size distribution of ZnS spheres.

**Figure S4:** (A) GDC curves and (B) Potential drop (IR drop) at different discharge current densities

**Figure S5:** (A) The comparison of CV curves of bare CT based supercapacitor and ZnS nanospheres assembled CT based supercapacitor, (B) The peak current density versus square root of scan rate.

**Figure S6:** (A) GDC curves and (B) Potential drop (IR drop) at different discharge current densities.

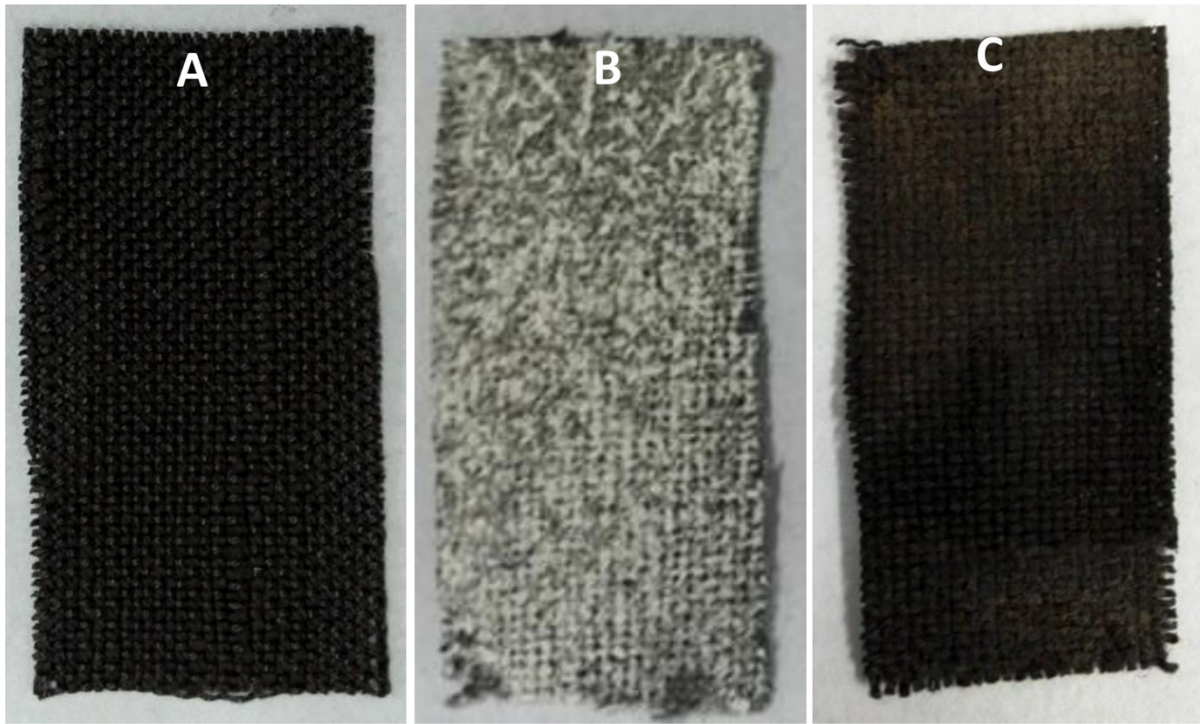

Figure S1: Optical photographs of carbon textile (CT). (A) Bare CT, (B) ZnS nanospheres assembled CT, (C) Annealed ZnS nanospheres assembled CT

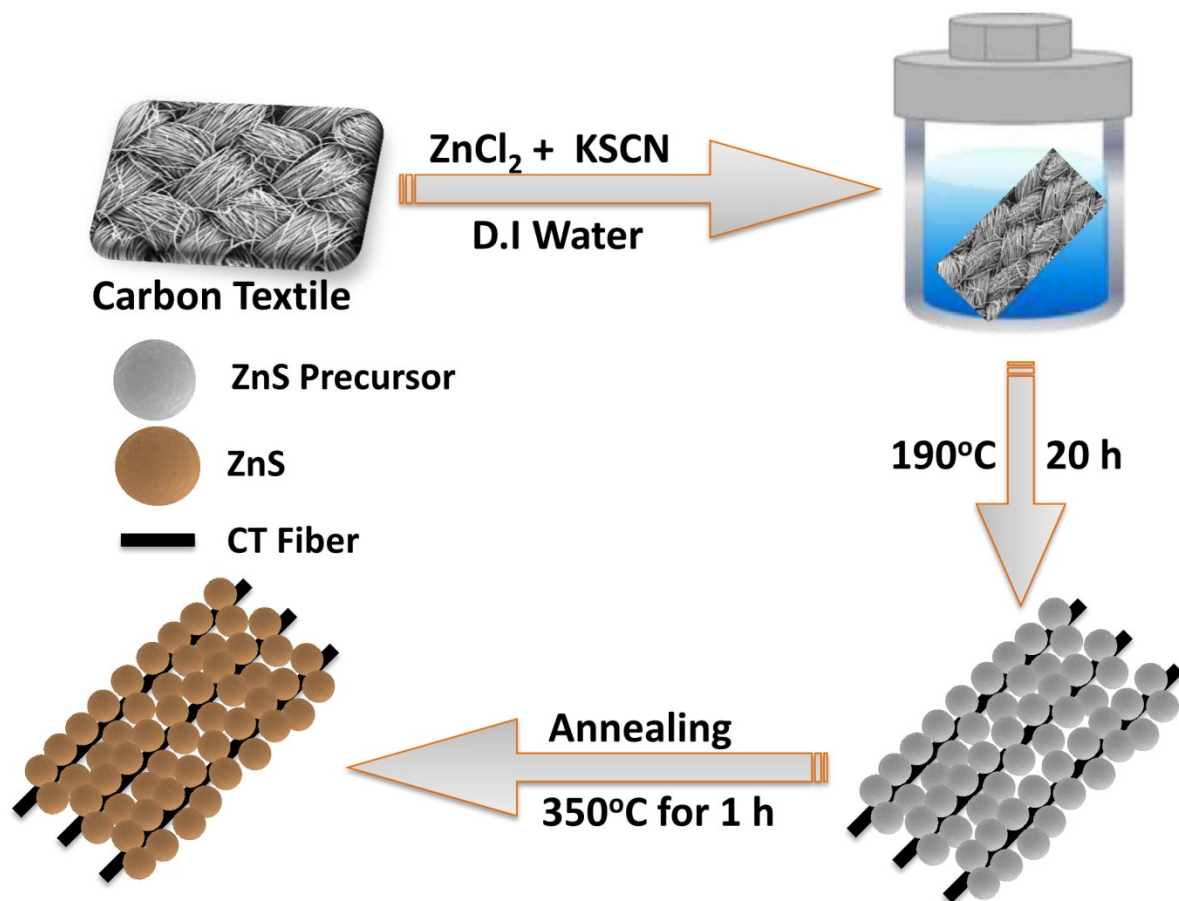

Figure S2: Schematic diagram of the fabrication process of ZnS assembled carbon textile with annealing process

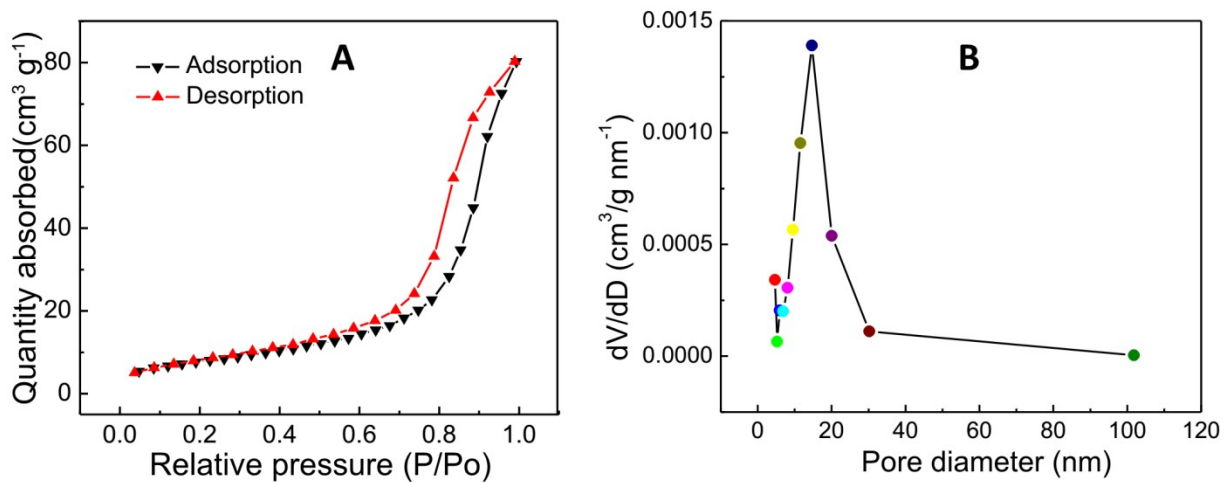

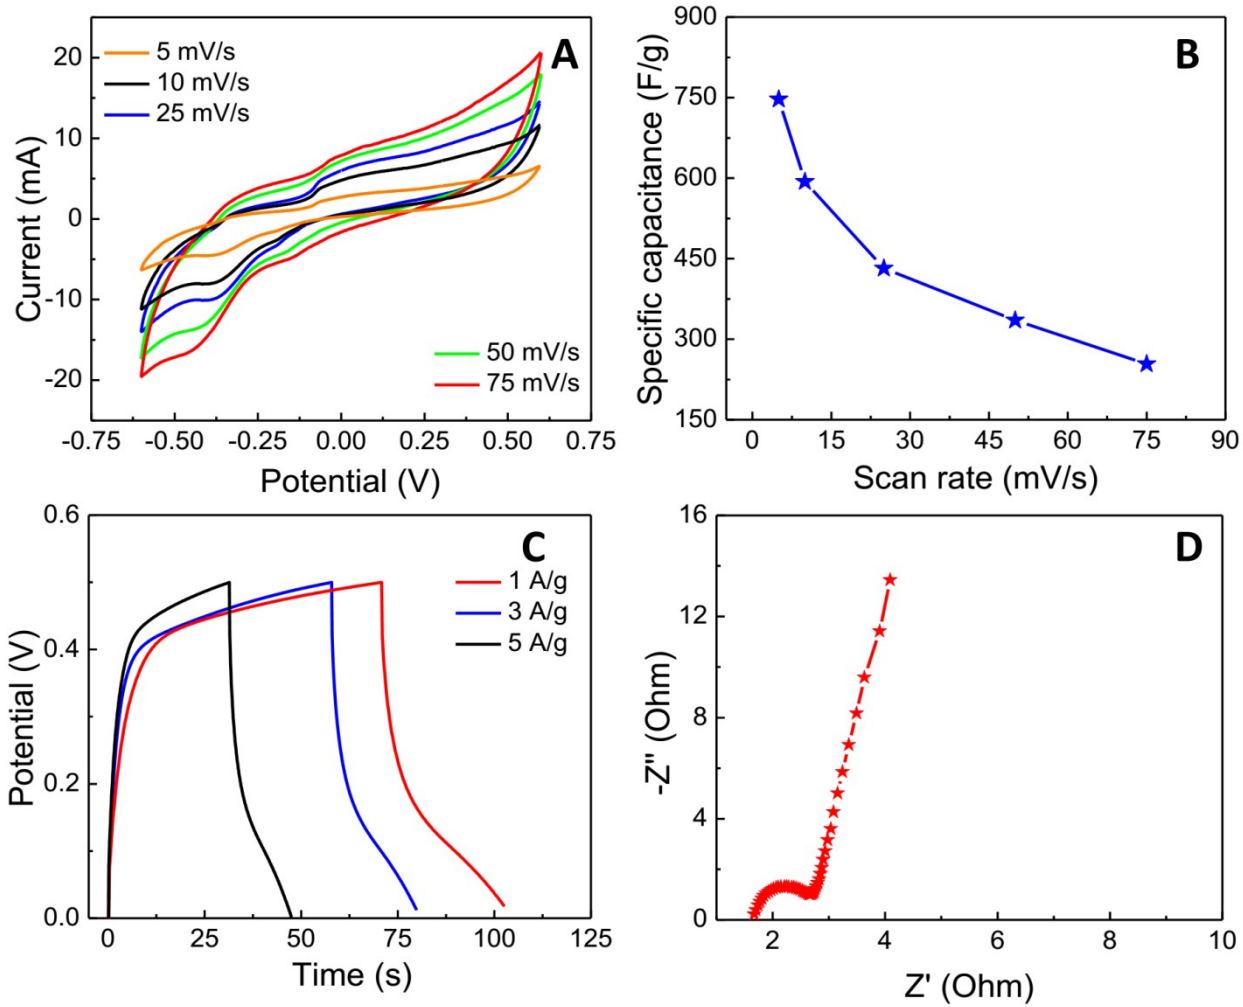

Figure S4: (A) GDC curves and (B) Potential drop (IR drop) at different discharge current densities

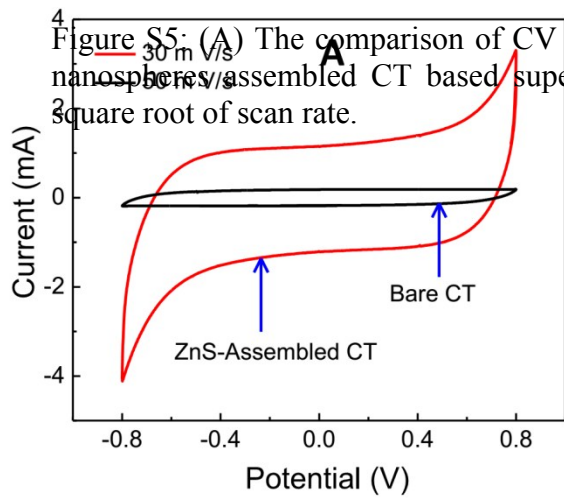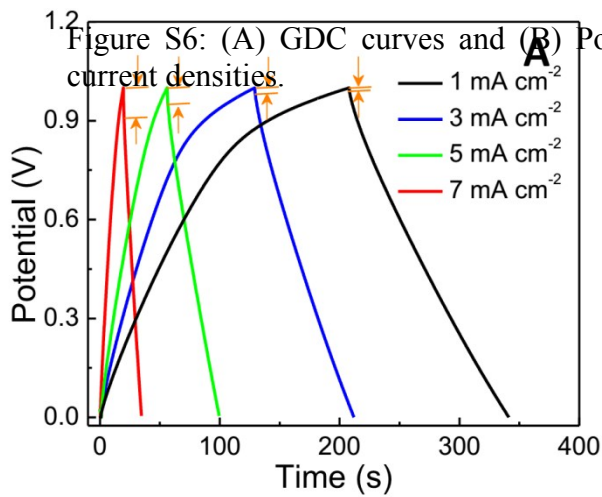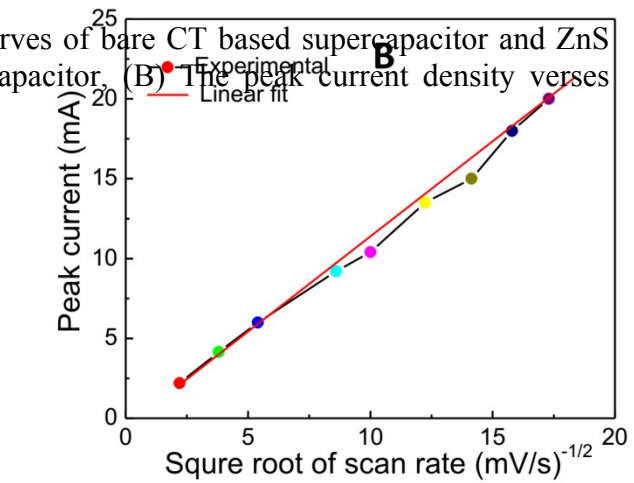

The specific capacitance ( $C_{sp}$ ), energy density (ED), power density (PD) and columbic efficiency ( $\eta$ ) of electrodes were calculated according to the following equations.<sup>7-9</sup>

$$C_{sp} = \frac{\int I dV}{M v (V_f - V_i)} \quad (1)$$

$$C_{arl} = \frac{C_{sp}}{A} \quad (2)$$

$$E = CV^2 \times \left( \frac{5}{36} \right) \quad (3)$$

$$P = \frac{E}{t_d} = \frac{I\Delta V}{2M} \times 1000 \quad (4)$$

Where  $C_{sp}$  ( $\text{Fg}^{-1}$ ) is the specific capacitance;  $C_{arl}$  ( $\text{F cm}^{-2}$ ) is the areal capacitance;  $\int I dV$  is the area of CV curve;  $A$  is the active area of supercapacitor;  $M$  (g) is the mass of active material on one electrode;  $\Delta V = V_f - V_i$  is the potential window;  $v$  ( $\text{Vs}^{-1}$ ) is the scan rate;  $I$  (A) is the applied current;  $P$  ( $\text{W kg}^{-1}$ ) is the power density;  $E$  ( $\text{Wh kg}^{-1}$ ) is the energy density;  $\Delta t_c$  and  $\Delta t_d$  are charging and discharging time (s) respectively.
